# Supplementary material for: Case Fatality Rate of Cancer Patients with COVID-19 in a New York Hospital System
Source: Oxford University Press journal article supplement (doi:10.1158/2159-8290.cd-20-0516), 2020-05-01
Supplement: 21598290cd200516-sup-241705_2_supp_6260745_q9gwt3.docx [file 21598290cd200516-sup-241705_2_supp_6260745_q9gwt3.docx]

**Supplementary Table 2: Detailed description of deceased cohort of patients with cancer and COVID-19**

| **Age** | **Gender** | **Diagnosis** | **CoMorbidities** | **Recent inpatient/ED** | **NH/shelter resident** | **ECOG PS >=2** | **Prior lung disease** | **Time from admission to death (days)** |
| --- | --- | --- | --- | --- | --- | --- | --- | --- |
| 60-70 | M | Locally advanced Oropharyngeal carcinoma | Prior trach/PEG, recent hip fx, admission for Orthopedic procedure | y | y | y | n | 2 |
| 90-100 | F | Advanced NSCLC | Prior DNR | n | Y | y | y | 6 |
| 80-90 | M | Stage III NSCLC | Radiation pneumonitis | n | n | n | y | 2 |
| 50-60 | F | Recurrent NSCLC, s/p XRT | Renal transplant/immune suppression, prior DNR | n | n | n | y | 11 |
| 50-60 | M | Advanced CRC | Morbid obesity | n | n | y | y | 7 |
| 80-90 | M | Advanced NSCLC and NHL | Recent chemo/immunotherapy | y | n | y | y | 2 |
| 80-90 | F | Advanced NSCLC | Dementia, DNR | y | y | y | y | 2 |
| 70-80 | M | Resected stage IB NSCLC | NH resident, DNR | n | Y | y | y | 8 |
| 60-70 | M | Resected colon cancer/meningioma | na | n | y | y | n | 13 |
| 70-80 | M | Meningioma | NH resident, obesity, dementia | n | Y | y | n | 2 |
| 10-20 | M | Advanced osteosarcoma | Resp failure prior to Covid | y | n | y | y | 7 |
| 60-70 | F | Ovarian carcinoma | NH resident s/p stroke, DNR | n | y | y | n | 12 |
| 50-60 | F | Advanced uterine carcinosarcoma | Admission for progressive disease | y | n | y | y | 3 |
| 70-80 | F | Resected endometrial cancer | na | n | n | n | n | 5 |
| 60-70 | F | Stage II cervical cancer s/p chemoradiation | Admission for GI bleed | y | n | y | n | 1 |
| 70-80 | F | Resected carcinosarcoma | Obesity | n | n | n | n | 3 |
| 80-90 | F | Localized prostate cancer, s/p surgery/XRT | HTN, CAD | n | n | y | n | 4 |
| 70-80 | F | Early stage breast cancer, s/p lumpectomy +XRT | Severe emphysema on home O2 | n | n | y | y | 2 |
| 60-70 | F | St I breast cancer s/p mastectomy | COPD, morbid obesity, poorly controlled DM | n | n | n | n | 15 |
| 70-80 | F | Metastatic HR+ breast cancer | Alzheimer's, schizophrenia | n | y | y | n | 11 |
| 50-60 | F | Advanced breast cancer, s/p cord compression/XRT | Advanced malignancy | y | y | y | y | 4 |
| 70-80 | F | Early stage breast cancer | Dementia, tracheostomy | n | y | y | n | 3 |
| 80-90 | F | Remote early stage colon cancer | na | n | n | y | n | 1 |
| 60-70 | M | Rectal cancer s/p chemoXRT in NED | na | n | n | y | n | 4 |
| 80-90 | M | Cecal ca, s/p hemicolectomy | Postop complications | y | n | y | n | 10 |
| 80-90 | M | Colorectal cancer, LAR 2016 | CAD, CKD, CHF | n | n | y | n | 3 |
| 70-80 | M | Colorectal cancer (resected) | Morbid obesity, HCV, COPD, HTN, CHF | n | y | y | y | 11 |
| 80-90 | M | Metastatic prostate cancer on bicalutamide, finasteride, tamsulosin | HTN, DM | n | n | y | n | 1 |
| 70-80 | M | Metastatic prostate cancer on leuprolide/cabazitaxel/abiraterone | na | n | n | n | n | 2 |
| 80-90 | M | Radical prostatectomy for early stage PC 24 yrs ago | DM, HTN, CAD | n | n | y | n | 4 |
| 70-80 | M | Metastatic prostate cancer on finasteride | CVA, DM, HIV, CKD, HTN, Dementia, former ETOH abuse | n | y | y | n | 2 |
| 70-80 | M | Prostate ca recurrence post XRT/hormones | CAD, DM, HTN | y | n | y | n | 2 |
| 70-80 | M | Bladder cancer s/p TUBR | Dementia, recent cardiac arrest | n | y | y | n | 5 |
| 80-90 | F | MM on Pomalyst, prior RCCA | HTN, CKD, obesity | n | n | y | n | 7 |
| 50-60 | F | MM | COPD, ESRD, sacral ulcer, cachexia | y | y | y | n | 6 |
| 80-90 | F | MPN on Hydrea | HTN | n | n | y | n | 5 |
| 90-100 | F | MM on Revlimid | HTN, DM, COPD | y | n | y | n | 1 |
| 30-40 | M | NHL | Psoriasis, EtOH, hepatorenal syndrome , bacteremia, GI bleed | y | n | n | n | 1 |
| 90-100 | M | MGUS, prostate cancer | CHF, CKD, HTN | n | y | y | n | 2 |
| 80-90 | F | MPN | Morbid obesity, PVD, recent admission for vascular surgery | y | n | y | y | 12 |
| 70-80 | F | NHL (Stage I lung MALT) | HTN, asthma, CKD, COPD, lives in shelter | n | y | n | n | 9 |
| 80-90 | M | DLBCL | DM, HTN, CHF, CKD | y | n | y | n | 4 |
| 80-90 | F | Hodgkin's Lymphoma | DM, HTN, CAD, falls | n | n | y | n | 6 |
| 60-70 | F | CLL on ibrutinib | Recent extensive hosp stay, VRE, EBV/HLH on Rituxan/Etoposide | y | n | y | n | 8 |
| 80-90 | M | MDS | MDS, HTN, dementia | n | y | y | n | 7 |
| 70-80 | M | MDS | HTN, CAD, DM | n | n | n | n | 2 |
| 50-60 | M | CMML (MDS) | CMML, admitted for subdural abscess | y | n | y | n | 6 |
| 70-80 | M | primary CNS NHL | Recent admission for chemotherapy | y | n | y | n | 4 |
| 70-80 | M | MM | Recent coronary artery bypass,CHF, admitted from Rehab | y | y | y | n | 7 |
| 70-80 | M | MM | CKD, DM, HTN, CAD | n | y | y | n | 3 |
| 80-90 | F | Advanced EGFR-mutated lung cancer | COPD, subdural hematoma after fall, past XRT with XRT pneumonitis | n | n | y | y | 1 |
| 60-70 | M | Pancreatic carcinoma (IMNT) | DM, HTN, dementia, CAD | n | n | y | n | 9 |
| 80-90 | M | CML | DM, CKD, HTN, CAD | n | y | y | n | 1 |
| 70-80 | M | Hepatocellular carcinoma (HCC) | Dementia | y | y | y | n | 1 |
| 40-50 | F | Recurrent HCC | Finished Immunotherapy, asthma, cirrhosis | y | n | y | n | 2 |
| 60-70 | M | CTCL | Dementia, HTN, DM, CKD | n | n | y | n | 7 |
| 70-80 | M | Locally advanced pancreatic cancer, untreated | na | n | n | n | n | 1 |
| 80-90 | M | Advanced GIST | Dementia, HTN, CHF | n | y | y | n | 3 |
| 40-50 | M | Advanced gastric cancer | massive GI bleed, prolonged inpatient stay, decubitus | y | n | y | n | 2 |
| 70-80 | M | Early stage gastric and prostate cancers | HTN, HLD, DM, ESRD on dialysis, CAD, CHF, COPD | n | n | y | y | 5 |
| 60-70 | M | Resected CRC | HTN, DM, malabsorption | n | n | n | n | 11 |
|  |  |  |  |  |  |  |  |  |
| Abbreviations: CRC: Colorectal cancer, MDS: Myelodysplastic syndromes, CMML: Chronic Myelomonocytic Leukemia, HTN: Hypertension; DM: Diabetes Mellitus; ESRD: End Stage Renal Disease; | | | | | | |  |  |
| CKD: Chronic Kidney Disease; COPD: Chronic Obstructive Pulmunary Disease; CHF: Congestive Heart Failure; | | | |  |  |  |  |  |
| HCC: Hepatocellular Carcinoma, CTCL: Cutaneous T Cell Lymphoma; | | |  |  |  |  |  |  |
| NSCLS: Non Small Cell Lung Cancer; GIST: Gastrointenstinal Stromal Tumor | | |  |  |  |  |  |  |
| MPN: Myeloproliferative neoplasm; MM: Multiple myeloma; MGUS: Monoclonal gammopathy of uncertain significance | | | |  |  |  |  |  |
