# Supplementary material for: Case Fatality Rate of Cancer Patients with COVID-19 in a New York Hospital System
Source: Oxford University Press journal article supplement (doi:10.1158/2159-8290.cd-20-0516), 2020-05-01
Supplement: 21598290cd200516-sup-241705_2_supp_6260746_q9gwt4.docx [file 21598290cd200516-sup-241705_2_supp_6260746_q9gwt4.docx]

| | **Supplementary table 1: Multivariate analysis of factors associated with case-fatality in patients with cancer and covid-19**. For lab value variables, the odds ratio shows increase for each 1 unit. | | | | | --- | --- | --- | --- | |  | **Odds Ratio** | | **P Value** | | **Age <=65** | 0.23 | (0.07-0.61) | 0.005 | | **ICU Admit** | 4.83 | (1.46-17.15) | 0.01 | | **Baseline Hgb** | 0.82 | (0.64-1.04) | 0.1 | | **Nadir Hgb** | 0.83 | (0.66-1.05) | 0.1 | | **D-Dimer** | 1.15 | (1.04-1.27) | 0.006 | | **Lactate** | 1.99 | (1.39-2.97) | 0.0003 | | **LDH** | 1.003 | (1.001-1.005) | 0.001 | | **Comorbidity Score** | 1.52 | (1.02-2.33) | 0.04 | | **Gender** | 2.54 | (0.39-2.22) | 0.9 | |
| --- | --- | --- | --- | --- | --- | --- | --- | --- | --- | --- | --- | --- | --- | --- | --- | --- | --- | --- | --- | --- | --- | --- | --- | --- | --- | --- | --- | --- | --- | --- | --- | --- | --- | --- | --- | --- | --- | --- | --- | --- | --- | --- | --- | --- |
